# Supplementary material for: Food insecurity and mental health of women during COVID-19: Evidence from a developing country
Source: PLOS journal article supplement (doi:10.1371/journal.pone.0255392), 2021-07-29
Supplement: S3 (10.1371/journal.pone.0255392.s003) [file journal.pone.0255392.s003]

S3 Table. Mixed effect model result of change in FIES score from wave 1 to wave 2 on PSS, KLC-19, and ALC-19 scores

| **PSS Score** | | | | |
| --- | --- | --- | --- | --- |
| **Change in PSS Score** | **Coefficient** | **Robust Standard Error** | **95% Confidence Interval** | **p-value** |
| Change in Food Security | -1.19959 | 0.1132927 | -1.42164; -0.9775407 | 0.000 |
| KLC-19 Score | -0.0306869 | 0.0421684 | -0.1133355; 0.0519617 | 0.467 |
| ALC-19 Score | 0.0460904 | 0.0790558 | -0.108856; 0.2010369 | 0.560 |
| Age | -0.0142561 | 0.0122944 | -0.0383527; 0.0098405 | 0.246 |
| Education Years | -0.0385578 | 0.0257066 | -0.0889418; 0.0118261 | 0.134 |
| Monthly Income | -0.0000104 | 0.0000183 | -0.0000463; 0.0000255 | 0.570 |
| **Random Effect Parameter** | **Estimates** | **Robust Standard Error** | **95% Confidence Interval** | |
| Residual Standard Error | 3.889361 | 0.1047392 | 3.6894; 4.10016 | |
| **KLC-19 Score** | | | | |
| **Change in KLC-19 Score** | **Coefficient** | **Robust Standard Error** | **95% Confidence Interval** | **p-value** |
| Change in Food Security | 0.0490138 | 0.0697117 | -0.0876186; 0.1856462 | 0.482 |
| PSS Score | -0.0133035 | 0.0152912 | -0.0432736; 0.0166667 | 0.384 |
| ALC-19 Score | 0.2018713 | 0.0508841 | 0.1021403; 0.3016023 | 0.000 |
| Age | -0.006959 | 0.0072722 | -0.0212122; 0.0072941 | 0.339 |
| Education Years | 0.0864494 | 0.0163071 | 0.0544881; 0.1184107 | 0.000 |
| Monthly Income | 0.0000127 | 8.31e-06 | -3.56e-06; 0.000029 | 0.126 |
| **Random Effect Parameter** | **Estimates** | **Robust Standard Error** | **95% Confidence Interval** | |
| Residual Standard Error | 2.306925 | 0.0455334 | 2.219385; 2.397918 | |
| **ALC-19 Score** | | | | |
| **Change in PSS Score** | **Coefficient** | **Robust Standard Error** | **95% Confidence Interval** | **p-value** |
| Change in Food Security | -0.0343309 | 0.0449129 | -0.1223586; 0.0536969 | 0.445 |
| PSS Score | 0.006656 | 0.0092685 | -0.01151; 0.0248219 | 0.473 |
| KLC-19 Score | 0.0424096 | 0.0160771 | 0.0108992; 0.0730201 | 0.008 |
| Age | 0.0075382 | 0.0039921 | -0.0002861; 0.0153626 | 0.059 |
| Education Years | 0.0279422 | 0.0131447 | 0.002179; 0.0537054 | 0.034 |
| Monthly Income | 0.0000122 | 4.77e-06 | 2.87e-06; 0.0000216 | 0.010 |
| **Random Effect Parameter** | **Estimates** | **Robust Standard Error** | **95% Confidence Interval** | |
| Residual Standard Error | 1.38909 | 0.0370078 | 1.318417; 1.463551 | |
